# Supplementary material
Source: PubMed Central journal article supplement (PMC7224085)
Supplement: 41375_2019_700_MOESM1_ESM.pdf [file 41375_2019_700_MOESM1_ESM.pdf]

### Supplemental figure legends (online only)

**Figure S1. Ratio of CGP metabolite to IM, and HCQ plasma levels.** (A) Ratio of current to baseline CGP to IM levels over sequential cycle follow-up. No correlation was detected between ratio and treatment cohort. (B) HCQ concentration (ng/ml) did not correlate with 12 month 'success' or 'failure' rates. IM = Imatinib; HCQ = Hydroxychloroquine.

**Figure S2. In vitro autophagy and functional response on HSPC population.** (A) Percentage of LC3B-II puncta positive cells by IF in CD34+ BM cells versus unselected PB (p=0.002). (B) Western blotting of LC3B-II and GAPDH in 3 patient samples (pt 42.6 – BM; pt 47 – BM; pt 60 – PB and BM) untreated and treated *in vitro* with HCQ. (C) Change from baseline in percentage of colonies by CFC analysis from CD34+-selected BM populations at 6 and 12 months in IM and IM/HCQ cohort. (D) Change from baseline in the percentage of colonies by LTC-IC analysis from CD34+-selected BM populations at 6 and 12 months in IM and IM/HCQ cohort. HSPC = haemopoietic stem and progenitor cell; IM = Imatinib; HCQ = Hydroxychloroquine.

**Table S1. Proportion of DMR split by 'high' and 'low' baseline *BCR-ABL1:ABL1* ratio according to median ratio at trial entry**

**Table S2. Sample number used in *in vitro* experiments**

Figure S1.

A

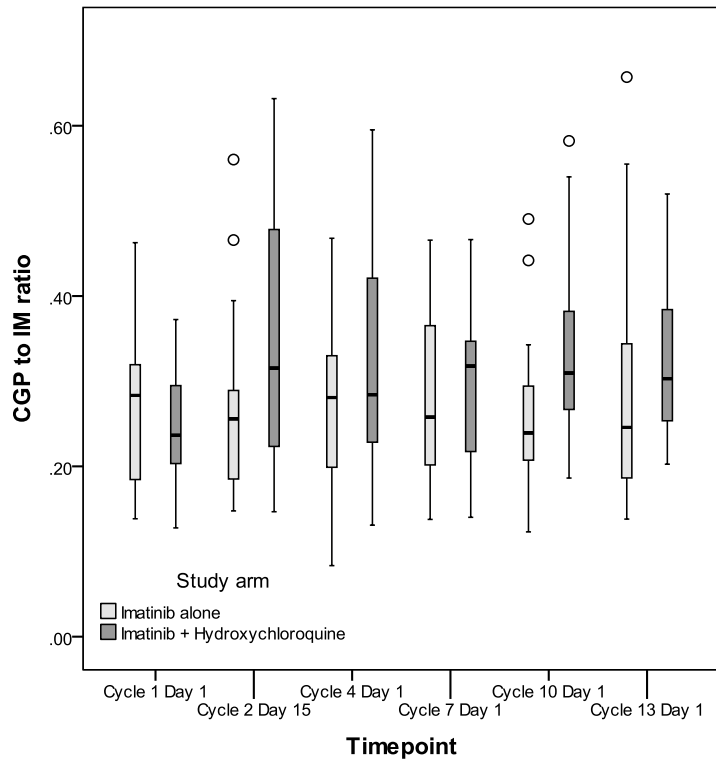

B

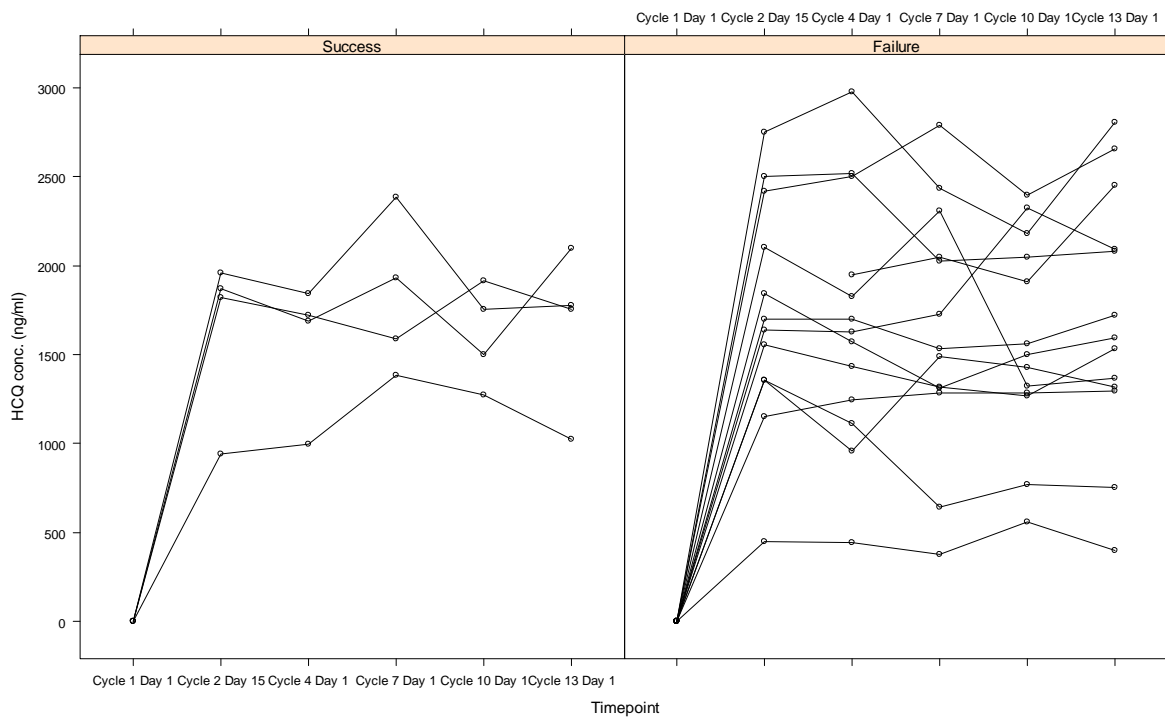

Figure S2.

**A**

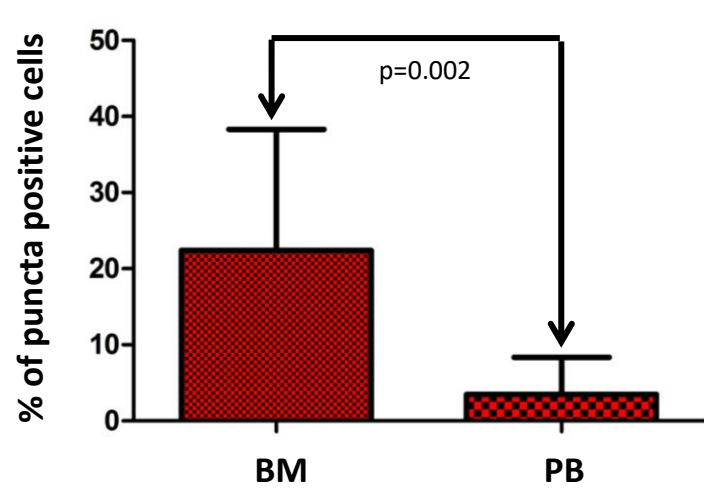

**B**

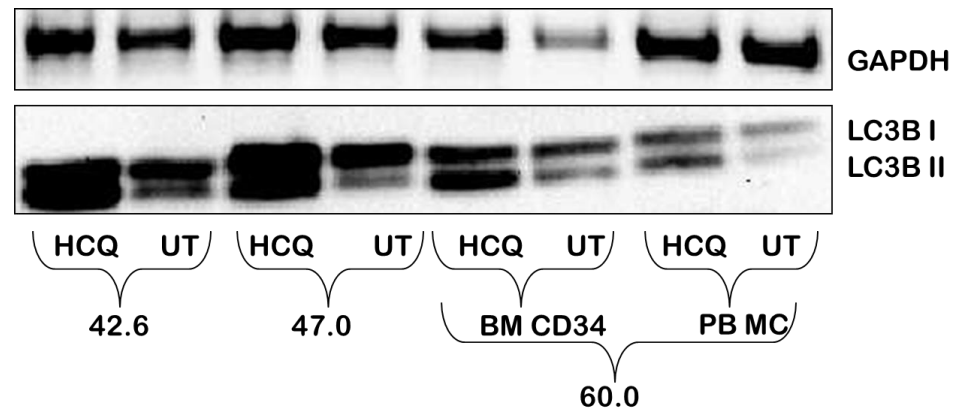

**C**

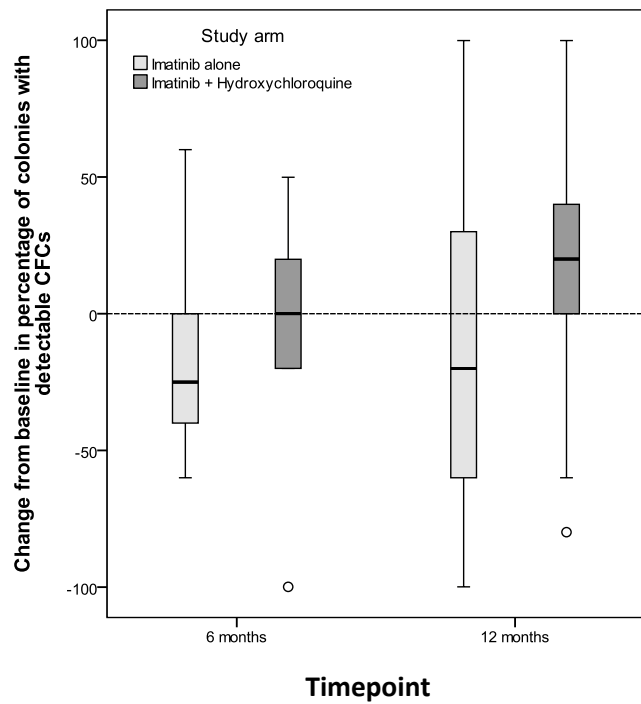

**D**

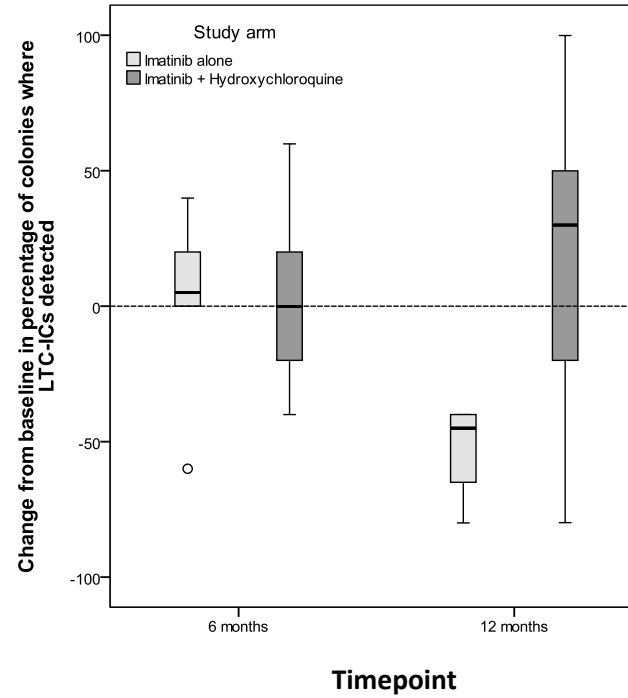

**Table S1: Proportion of DMR split by 'high' and 'low' baseline *BCR-ABL1:ABL1* ratio according to median ratio at trial entry**

|                                                                                                             |                                               |            | Study arm |              |                 |           |              |                 |
|-------------------------------------------------------------------------------------------------------------|-----------------------------------------------|------------|-----------|--------------|-----------------|-----------|--------------|-----------------|
|                                                                                                             |                                               |            | IM        |              |                 | IM/HCQ    |              |                 |
|                                                                                                             |                                               |            | Count     | ITT %        | Complete Case % | Count     | ITT %        | Complete Case % |
| <b>High baseline BCR-ABL</b>                                                                                | <b>MR3 (BCR-ABL &lt;= 0.1%) achieved?</b>     | <b>Yes</b> | <b>6</b>  | <b>46.2%</b> | <b>50.0%</b>    | <b>13</b> | <b>72.2%</b> | <b>92.9%</b>    |
|                                                                                                             |                                               | No         | 6         | 46.2%        | 50.0%           | 1         | 5.6%         | 7.1%            |
|                                                                                                             |                                               | Missing    | 1         | 7.7%         | 0.0%            | 4         | 22.2%        | 0.0%            |
|                                                                                                             |                                               | Total      | 13        | 100.0%       | 100.0%          | 18        | 100.0%       | 100.0%          |
| 95% CI: 7.7% lower to 53.6% higher; unadjusted 2-sided p-value = 0.26; FDR adjusted 2-sided p-value = 0.85  |                                               |            |           |              |                 |           |              |                 |
| <b>Low baseline BCR-ABL</b>                                                                                 | <b>MR3 (BCR-ABL &lt;= 0.1%) achieved?</b>     | <b>Yes</b> | <b>15</b> | <b>88.2%</b> | <b>100.0%</b>   | <b>11</b> | <b>78.6%</b> | <b>100.0%</b>   |
|                                                                                                             |                                               | No         | 0         | 0.0%         | 0.0%            | 0         | 0.0%         | 0.0%            |
|                                                                                                             |                                               | Missing    | 2         | 11.8%        | 0.0%            | 3         | 21.4%        | 0.0%            |
|                                                                                                             |                                               | Total      | 17        | 100.0%       | 100.0%          | 14        | 100.0%       | 100.0%          |
| 95% CI: 37.2% lower to 16.8% higher; unadjusted 2-sided p-value = 0.64; FDR adjusted 2-sided p-value = 0.87 |                                               |            |           |              |                 |           |              |                 |
| <b>High baseline BCR-ABL</b>                                                                                | <b>MR4 (BCR-ABL &lt;= 0.01%) achieved?</b>    | <b>Yes</b> | <b>2</b>  | <b>15.4%</b> | <b>16.7%</b>    | <b>6</b>  | <b>33.3%</b> | <b>42.9%</b>    |
|                                                                                                             |                                               | No         | 10        | 76.9%        | 83.3%           | 8         | 44.4%        | 57.1%           |
|                                                                                                             |                                               | Missing    | 1         | 7.7%         | 0.0%            | 4         | 22.2%        | 0.0%            |
|                                                                                                             |                                               | Total      | 13        | 100.0%       | 100.0%          | 18        | 100.0%       | 100.0%          |
| 95% CI: 13.9% lower to 43.4% higher; unadjusted 2-sided p-value = 0.41; FDR adjusted 2-sided p-value = 0.85 |                                               |            |           |              |                 |           |              |                 |
| <b>Low baseline BCR-ABL</b>                                                                                 | <b>MR4 (BCR-ABL &lt;= 0.01%) achieved?</b>    | <b>Yes</b> | <b>9</b>  | <b>52.9%</b> | <b>60.0%</b>    | <b>6</b>  | <b>42.9%</b> | <b>54.5%</b>    |
|                                                                                                             |                                               | No         | 6         | 35.3%        | 40.0%           | 5         | 35.7%        | 45.5%           |
|                                                                                                             |                                               | Missing    | 2         | 11.8%        | 0.0%            | 3         | 21.4%        | 0.0%            |
|                                                                                                             |                                               | Total      | 17        | 100.0%       | 100.0%          | 14        | 100.0%       | 100.0%          |
| 95% CI: 40.0% lower to 22.9% higher; unadjusted 2-sided p-value = 0.72; FDR adjusted 2-sided p-value = 0.87 |                                               |            |           |              |                 |           |              |                 |
| <b>High baseline BCR-ABL</b>                                                                                | <b>MR4.5 (BCR-ABL &lt;= 0.032%) achieved?</b> | <b>Yes</b> | <b>0</b>  | <b>0.0%</b>  | <b>0.0%</b>     | <b>3</b>  | <b>16.7%</b> | <b>21.4%</b>    |
|                                                                                                             |                                               | No         | 12        | 92.3%        | 100.0%          | 11        | 61.1%        | 78.6%           |
|                                                                                                             |                                               | Missing    | 1         | 7.7%         | 0.0%            | 4         | 22.2%        | 0.0%            |
|                                                                                                             |                                               | Total      | 13        | 100.0%       | 100.0%          | 18        | 100.0%       | 100.0%          |
| 95% CI cannot be computed; unadjusted 2-sided p-value = 0.25; FDR adjusted 2-sided p-value = 0.85           |                                               |            |           |              |                 |           |              |                 |
| <b>Low baseline BCR-ABL</b>                                                                                 | <b>MR4.5 (BCR-ABL &lt;= 0.032%) achieved?</b> | <b>Yes</b> | <b>5</b>  | <b>29.4%</b> | <b>33.3%</b>    | <b>2</b>  | <b>14.3%</b> | <b>18.2%</b>    |
|                                                                                                             |                                               | No         | 10        | 58.8%        | 66.7%           | 9         | 64.3%        | 81.8%           |
|                                                                                                             |                                               | Missing    | 2         | 11.8%        | 0.0%            | 3         | 21.4%        | 0.0%            |
|                                                                                                             |                                               | Total      | 17        | 100.0%       | 100.0%          | 14        | 100.0%       | 100.0%          |
| 95% CI: 41.0% lower to 15.2% higher; unadjusted 2-sided p-value = 0.41; FDR adjusted 2-sided p-value = 0.85 |                                               |            |           |              |                 |           |              |                 |
| <b>High baseline BCR-ABL</b>                                                                                | <b>MR5 (BCR-ABL &lt;= 0.001%) achieved?</b>   | <b>Yes</b> | <b>0</b>  | <b>0.0%</b>  | <b>0.0%</b>     | <b>2</b>  | <b>11.1%</b> | <b>14.3%</b>    |
|                                                                                                             |                                               | No         | 12        | 92.3%        | 100.0%          | 12        | 66.7%        | 85.7%           |
|                                                                                                             |                                               | Missing    | 1         | 7.7%         | 0.0%            | 4         | 22.2%        | 0.0%            |
|                                                                                                             |                                               | Total      | 13        | 100.0%       | 100.0%          | 18        | 100.0%       | 100.0%          |
| 95% CI cannot be computed; unadjusted 2-sided p-value = 0.50; FDR adjusted 2-sided p-value = 0.85           |                                               |            |           |              |                 |           |              |                 |
| <b>Low baseline BCR-ABL</b>                                                                                 | <b>MR5 (BCR-ABL &lt;= 0.001%) achieved?</b>   | <b>Yes</b> | <b>2</b>  | <b>11.8%</b> | <b>13.3%</b>    | <b>0</b>  | <b>0.0%</b>  | <b>0.0%</b>     |
|                                                                                                             |                                               | No         | 13        | 76.5%        | 86.7%           | 11        | 78.6%        | 100.0%          |
|                                                                                                             |                                               | Missing    | 2         | 11.8%        | 0.0%            | 3         | 21.4%        | 0.0%            |
|                                                                                                             |                                               | Total      | 17        | 100.0%       | 100.0%          | 14        | 100.0%       | 100.0%          |
| 95% CI cannot be computed; unadjusted 2-sided p-value = 0.49; FDR adjusted 2-sided p-value = 0.85           |                                               |            |           |              |                 |           |              |                 |

**Table S2: Sample number used in *in vitro* experiments**

|                         | Number of samples |        |
|-------------------------|-------------------|--------|
|                         | IM                | IM/HCQ |
| <b>Peripheral blood</b> |                   |        |
| Baseline                | 5                 | 6      |
| 6 months                | 0                 | 3      |
| 12 months               | 1                 | 3      |
| <b>Bone marrow</b>      |                   |        |
| Baseline                | 2                 | 5      |
| 6 months                | 0                 | 3      |
| 12 months               | 1                 | 4      |
